# Supplementary material for: The Feasibility and Acceptability of The Girls Peer Activity (G-PACT) Peer-led Mentoring Intervention
Source: Children (Basel). 2018 Sep 19;5(9):128. doi: 10.3390/children5090128 (PMC6162561; doi:10.3390/children5090128)
Supplement: Supplementary file 1 [file children-05-00128-s001.pdf]

# The Feasibility and Acceptability of The Girls Peer Activity (G-PACT) Peer-led Mentoring Intervention

Michael B. Owen <sup>1\*</sup>, Charlotte Kerner <sup>1,2</sup>, Sarah L. Taylor <sup>1</sup>, Robert J. Noonan <sup>1</sup>, Lisa Newson <sup>3</sup>, Maria-Christina Kosteli <sup>1</sup>, Whitney B. Curry <sup>4</sup>, and Stuart J. Fairclough<sup>1</sup>

<sup>1</sup> Movement Behaviours, Health and Wellbeing Research Group, Department of Sport and Physical Activity, Edge Hill University, St Helens Road, Ormskirk, Lancashire, L39 4QP, UK; sarah.taylor11@go.edgehill.ac.uk (S.L.T.); robert.noonan@edgehill.ac.uk (R.J.N.); maria-christina.kosteli@edgehill.ac.uk (M-C.K.); stuart.fairclough@edgehill.ac.uk (S.J.F.)

<sup>2</sup> Department of Life Sciences, Brunel University, London, UB8 3PH, UK; Charlotte.Kerner@brunel.ac.uk

<sup>3</sup> Natural Sciences and Psychology, Research Centre for Brain and Behaviour, Liverpool John Moores University, Liverpool, L3 5AF, UK; l.m.Newson@ljmu.ac.uk

<sup>4</sup> Wellbeing and Public Health, Cornwall Council, Truro, TR1 3AY, UK; whitney.curry@cornwall.gov.uk

\* Correspondence: Michael.Owen@edgehill.ac.uk; Tel.: +44-016956-57344

## Supplementary 1 – Table 1. Example Topic Guides

| Group | Topic Area                       | Example Questions                                                                                                                                                                                                                                                  |
|-------|----------------------------------|--------------------------------------------------------------------------------------------------------------------------------------------------------------------------------------------------------------------------------------------------------------------|
| Peers | Interactions with Leaders        | Did you receive any handouts from the Leaders?<br>Did you know who the Leaders were?<br>How did the leaders interact with you? (where and when)<br>Did the Leaders encourage you to do more PA?<br>How did the Leaders communicate with you? (face to face, phone) |
|       | School-based physical activities | If you did attend the afterschool club?<br>What are your experiences of the afterschool club sessions?<br>Did you do any additional PA with your friends or leaders?                                                                                               |
|       | Data collection procedures       | How did you find wearing the activity watches (accelerometers) for 7 days?                                                                                                                                                                                         |
|       | Leadership role                  | How did you find your role as a PA leader?<br>Did you feel supported in your role?                                                                                                                                                                                 |

|          |                                  |                                                                                                                                                                                                               |
|----------|----------------------------------|---------------------------------------------------------------------------------------------------------------------------------------------------------------------------------------------------------------|
| Leaders  | Interaction with Peers           | How did you interact with your peers?<br>How did your friends / classmates respond to the information you were passing out?                                                                                   |
|          | Leadership training              | After the first session, did you understand what your role was as a Year 9 PA leader?                                                                                                                         |
|          | Interaction with Mentors         | What were your experiences of your leadership training sessions?<br>How did you interact with your Mentors who took the leadership training sessions?                                                         |
|          | School-based physical activities | Did you attend the new after school club in your school?<br>How did you feel about the type of activity chosen for the after school sessions?                                                                 |
|          | Data collection procedures       | How did you find wearing the activity watches (accelerometers) for 7 days?                                                                                                                                    |
| Mentors  | Mentor Role                      | Did you understand your role as a Mentor?<br>Did your training prepare you for your role?<br>Did you encounter any barriers?                                                                                  |
|          | Interaction with Leaders         | How did you find delivering the leadership sessions to the Leaders?<br>How did you interact and engage with the Leaders?<br>How did the Leaders respond to the training?                                      |
|          | School experiences               | What are your experiences of working in the school setting as part of this project?<br>Was the space provided in the school suitable for your planned sessions?<br>Did you interact with the school teachers? |
| Teachers | Project experience               | What is your perspective on how the PA project was implemented within your school over the last 2 months?                                                                                                     |
|          | Leadership Selection             | How did you find the leadership selection process?<br>Do you think this could have been improved?<br>What impact do you think the project had in your school?                                                 |

|  |                               |                                                                                                                                                                                                              |
|--|-------------------------------|--------------------------------------------------------------------------------------------------------------------------------------------------------------------------------------------------------------|
|  | Leaders and Peers interaction | <p>Do you think that the leaders fully understood their roles and responsibilities?</p> <p>How did the Peers respond to the project?</p> <p>How did the additional after-school clubs work?</p>              |
|  | Project practicality          | <p>How much work was it for you personally to be involved in organising the project onto of your job demands?</p> <p>What is you experiences of the girls wearing the activity watches (accelerometers)?</p> |
